# Supplementary material
Source: Royal Society of Chemistry journal article supplement (doi:10.1039/d5ee07525d)
Supplement: d5ee07525d1.pdf [file d5ee07525d1.pdf]

**Supporting Information for**

**Breaking the Cascade Dissolution Loop through Self-inhibition  
Mechanism for Zinc Vanadium Oxide Battery**

Weina Xu<sup>1</sup>, Zimin Li<sup>1</sup>, Kangjie Li<sup>1</sup>, Huitong Lin<sup>1</sup>, Shaobing Zhang<sup>2</sup>, Ruohan Yu<sup>3,\*</sup>,  
Haoqing Ma<sup>3</sup>, Liheng Zheng<sup>3</sup>, Zijie Tang<sup>4</sup>, Guobin Zhang<sup>5,\*</sup>, Jialun Guo<sup>1</sup>, Fujia Zuo<sup>1</sup>,  
Lei Zhang<sup>3,\*</sup>, Kangning Zhao<sup>2,\*</sup>

<sup>1</sup> School of Materials Science and Engineering, Dongguan University of Technology,  
Guangdong 523808, P. R. China

<sup>2</sup> School of Physical Sciences, Great Bay University, Dongguan 523808, P. R. China

<sup>3</sup> Department of Materials Science and Technology, Wuhan University of Technology,  
Wuhan 430050, P. R. China

<sup>4</sup> Dongguan Amazinc Energy Limited, P. R. China

<sup>5</sup> Future Technology School, Shenzhen Technology University, Shenzhen, 518055  
China

\*Corresponding authors.

E-mail: [yuruohan@whut.edu.cn](mailto:yuruohan@whut.edu.cn) (Ruohan Yu); [whutzgb@163.com](mailto:whutzgb@163.com) (Guobin Zhang);  
[zhanglei1990@whut.edu.cn](mailto:zhanglei1990@whut.edu.cn) (Lei Zhang); [vicysel@gbu.edu.cn](mailto:vicysel@gbu.edu.cn) (Kangning Zhao)

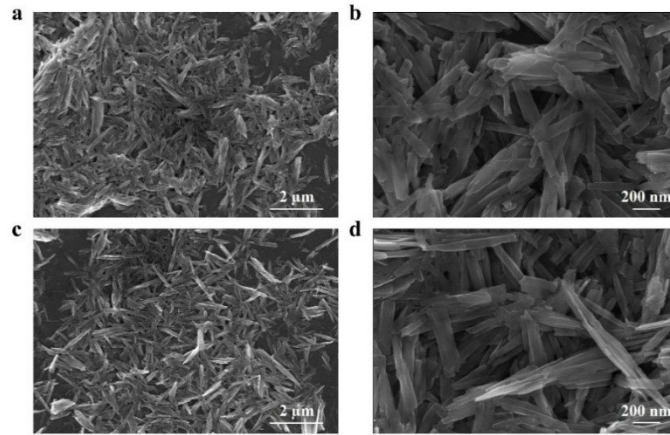

**Fig. S1** SEM images of **a, b** VO<sub>2</sub> and **c, d** Ca-VO<sub>2</sub>.

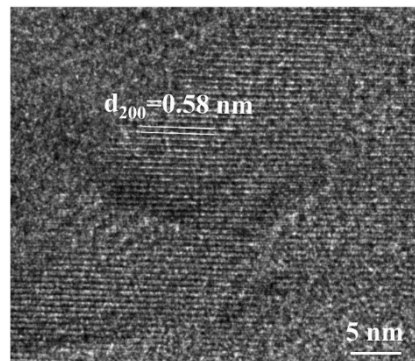

**Fig. S2** HRTEM image of VO<sub>2</sub>.

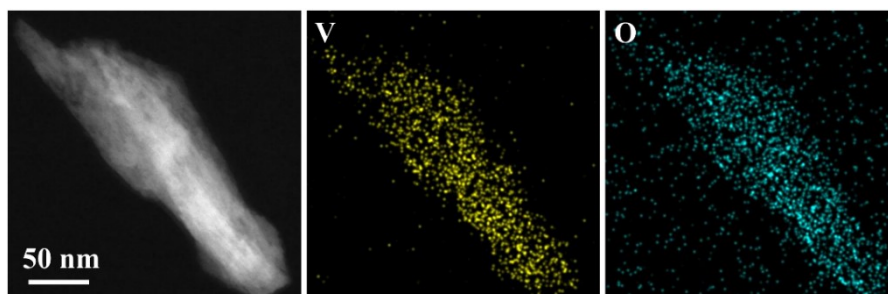

**Fig. S3** HAADF-STEM image of VO<sub>2</sub> with corresponding elemental mapping.

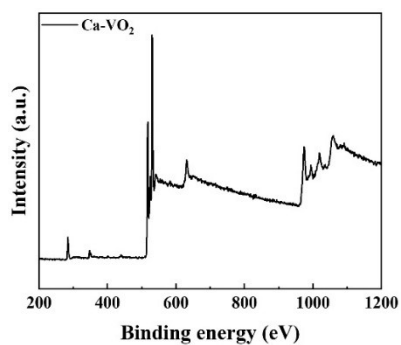

**Fig. S4** XPS spectrum of Ca-VO<sub>2</sub>.

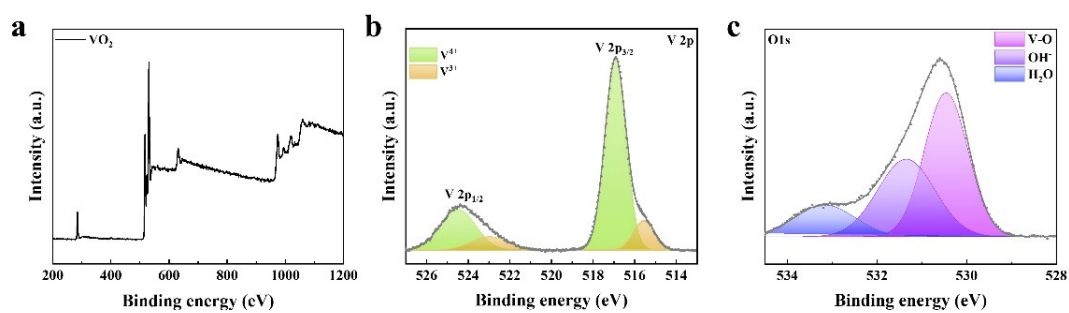

**Fig. S5 a** XPS spectrum of VO<sub>2</sub>. **b** V 2p and **c** O 1s high-resolution XPS spectra.

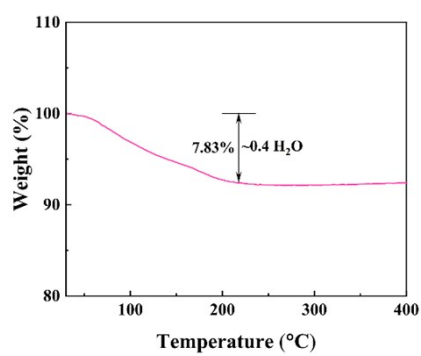

**Fig. S6** TGA curve of Ca-VO<sub>2</sub>.

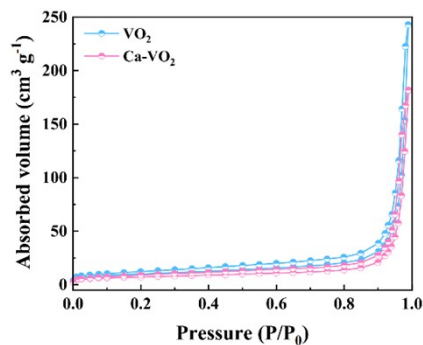

**Fig. S7** BET surface area analysis of VO<sub>2</sub> and Ca-VO<sub>2</sub>.

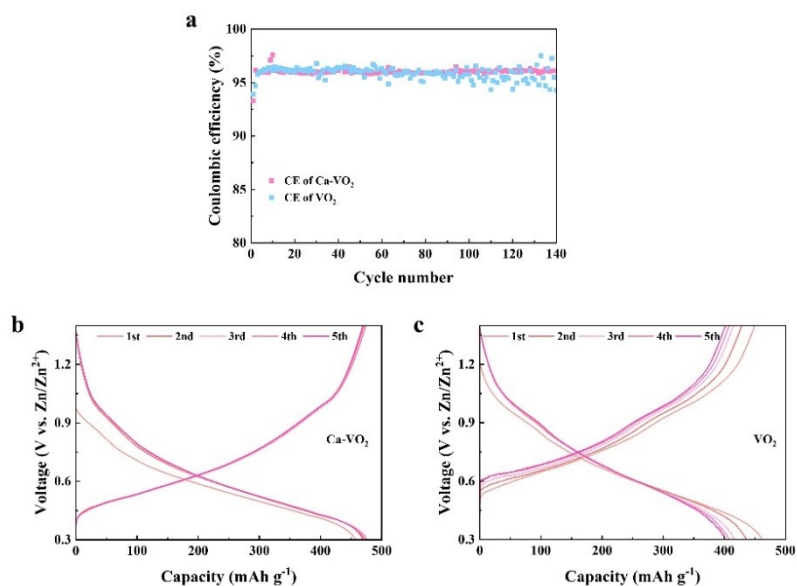

**Fig. S8 a** Coulombic efficiency of the Ca-VO<sub>2</sub> and VO<sub>2</sub> cathodes at 0.1 A g<sup>-1</sup>. GCD curves of **b** Ca-VO<sub>2</sub> and **c** VO<sub>2</sub> at first five cycles at 0.1 A g<sup>-1</sup>.

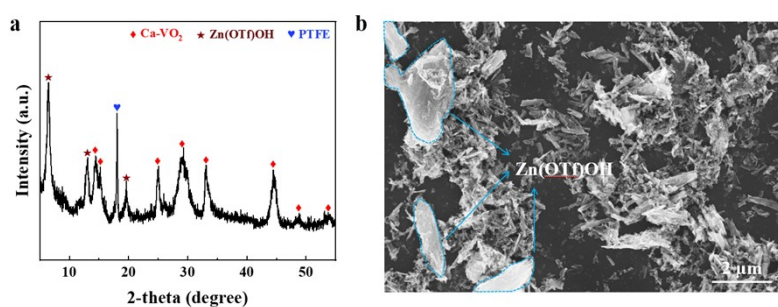

**Fig. S9 a** XRD pattern and **b** SEM of the Ca-VO<sub>2</sub> cathode after cycling at 0.1 A g<sup>-1</sup>.

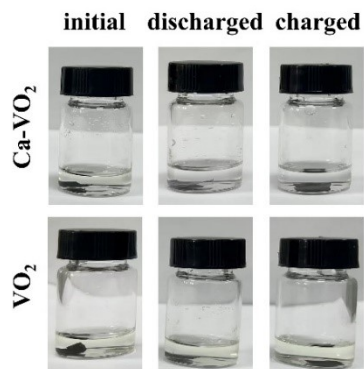

**Fig. S10** The corresponding color variation for vanadium dissolution of the VO<sub>2</sub> and Ca-VO<sub>2</sub> electrodes in Zn(OTf)<sub>2</sub> electrolytes for 40 days at initial, discharged, and charged states.

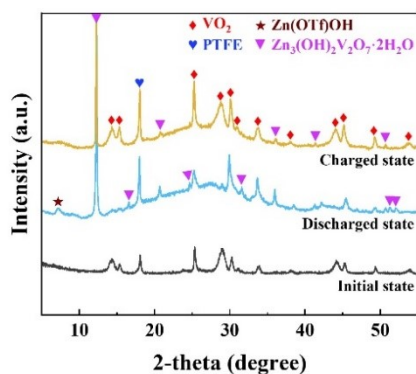

**Fig. S11** XRD patterns of the VO<sub>2</sub> cathodes in initial, discharged and charged states.

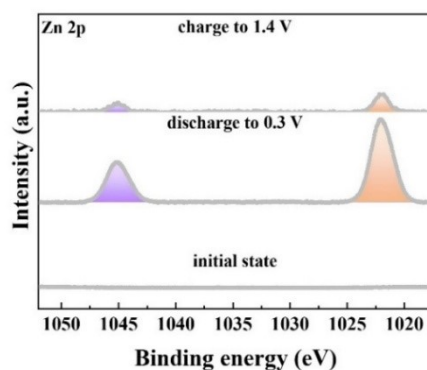

**Fig. S12** *Ex-situ* XPS spectrum of Zn 2p in the Ca-VO<sub>2</sub> cathode at initial, discharged, and charged states.

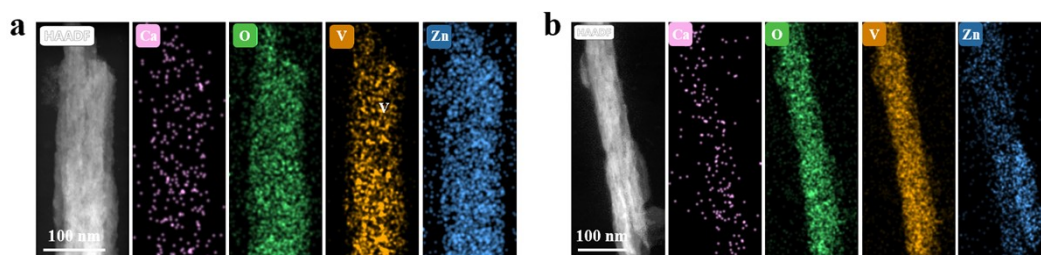

**Fig. S13** The elemental mapping of the Ca-VO<sub>2</sub> cathodes at **a** discharged state and **b** charged state.

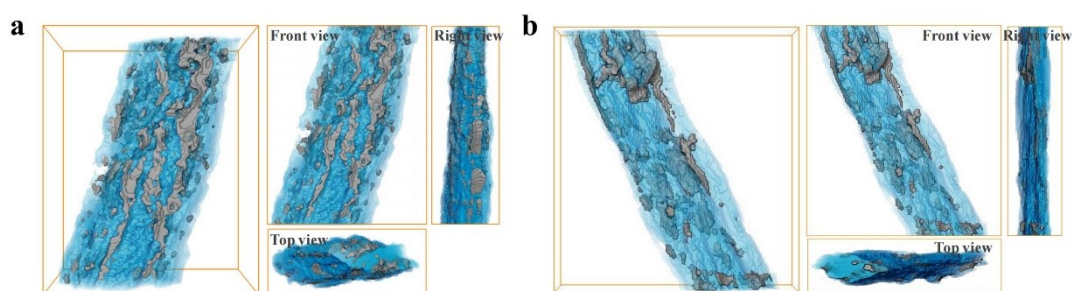

**Fig. S14** The segmentation by contrast corresponding to Ca-VO<sub>2</sub> (blue) and a mixture of CaV<sub>2</sub>O<sub>6</sub>·2H<sub>2</sub>O with Zn(OTf)OH (gray), and corresponding front, top, and right views for the reconstructed Ca-VO<sub>2</sub> nanorod at **a** the discharged state and **b** the charged state.

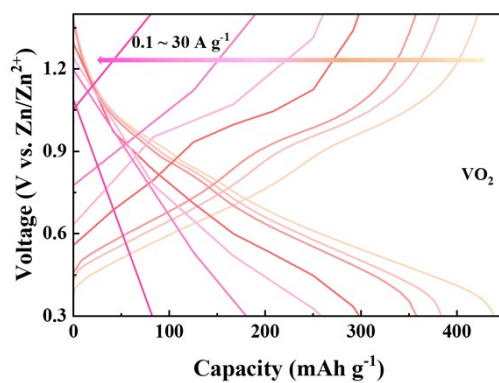

**Fig. S15** GCD curves of the VO<sub>2</sub> cathode at different current densities increasing from 0.1 to 30 A g<sup>-1</sup>.

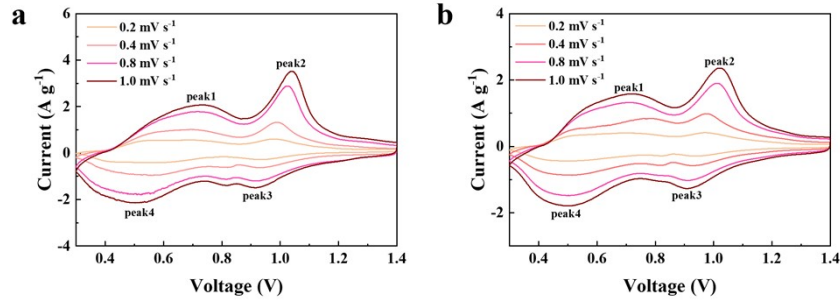

**Fig. S16** CV curves of **a** Ca-VO<sub>2</sub> and **b** VO<sub>2</sub> cathodes at different scan rates.

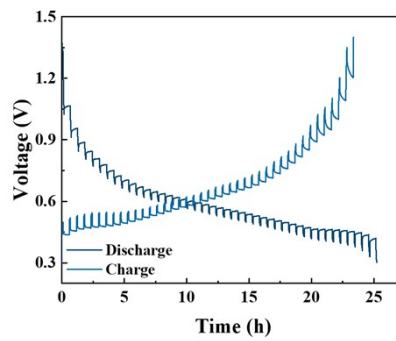

**Fig. S17** GITT curve of the VO<sub>2</sub> cathode.

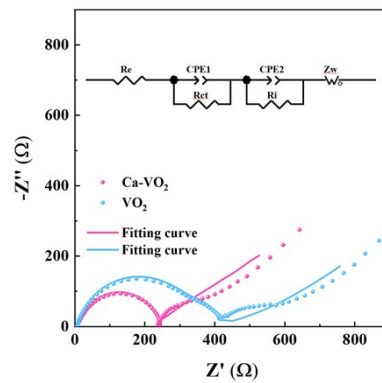

**Fig. S18** Nyquist plots of the Ca-VO<sub>2</sub> and VO<sub>2</sub> cathodes. The inset is the equivalent circuit.

The EIS data are fitted using the equivalent circuit shown in the inset of Fig. S18, which consists of two constant phase elements (CPE<sub>1</sub> and CPE<sub>2</sub>), ohmic resistance (R<sub>e</sub>), charge transfer resistance (R<sub>ct</sub>), interface resistance (R<sub>i</sub>), and Warburg element (Z<sub>w</sub>), respectively. And the fitting results are listed in Table S3.

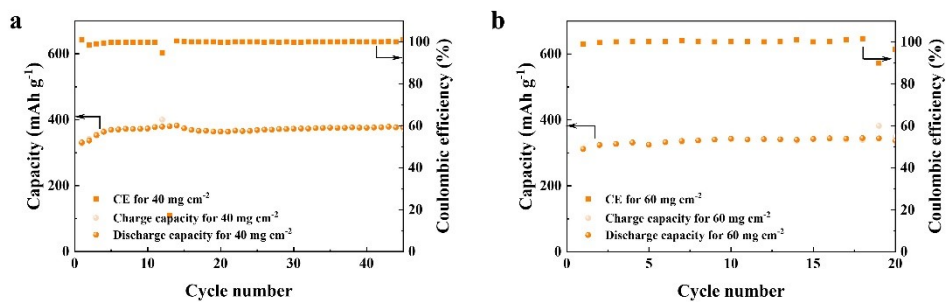

**Fig. S19** Cycling performances of the Ca-VO<sub>2</sub> cathode at 0.1 A g<sup>-1</sup> with high mass loadings: **a** 40 mg cm<sup>-2</sup> and **b** 60 mg cm<sup>-2</sup>.

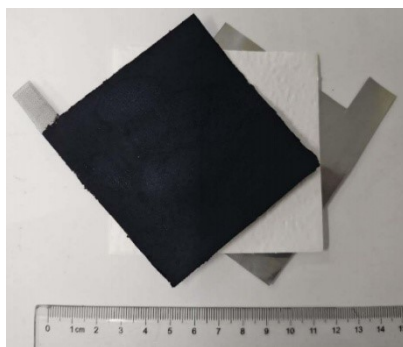

**Fig. S20** Schematic diagram of the pouch cell configuration.

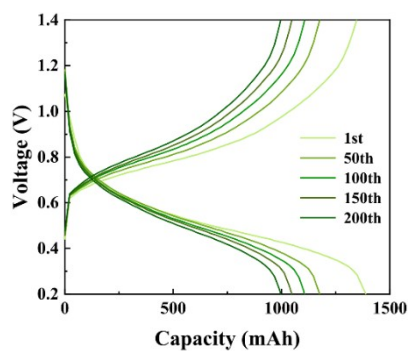

**Fig. S21** GCD curves of Ca-VO<sub>2</sub>/Zn pouch cell at selected cycles at 0.5 A g<sup>-1</sup>.

**Table S1.** ICP-OES result of Ca-VO<sub>2</sub>.

| Element | Test solution element concentration [mg/L] | Element content W [%] |
|---------|--------------------------------------------|-----------------------|
| Ca      | 21.2267                                    | 2.07697               |
| V       | 539.3050                                   | 52.7697               |

**Table S2.** A comparison of the long-term cycling performance between our as-prepared Ca-VO<sub>2</sub> cathode and current state-of-the-art vanadium-based cathodes for zinc-ion batteries.

| Material                                                                       | Electrolyte                                          | Voltage [V] | Capacity/Current Density [mAh g <sup>-1</sup> /A g <sup>-1</sup> ] | Capacity retention/ Cycle Performance | Refs. |
|--------------------------------------------------------------------------------|------------------------------------------------------|-------------|--------------------------------------------------------------------|---------------------------------------|-------|
| VO <sub>2</sub> (B)                                                            | 3M Zn(CF <sub>3</sub> SO <sub>3</sub> ) <sub>2</sub> | 0.2-1.5     | 344.8/10                                                           | 84.3%/5000                            | [1]   |
| Iodine-doped Na <sub>2</sub> V <sub>6</sub> O <sub>16</sub> ·3H <sub>2</sub> O | 3M Zn(CF <sub>3</sub> SO <sub>3</sub> ) <sub>2</sub> | 0-1.6       | 289/10                                                             | 74.9%/12000                           | [2]   |
| W <sub>0.05</sub> V <sub>0.95</sub> O <sub>1.94</sub> (B)                      | 2M Zn(CF <sub>3</sub> SO <sub>3</sub> ) <sub>2</sub> | 0.3-1.4     | 222/10                                                             | 89%/2000                              | [3]   |
| CaV <sub>4</sub> O <sub>9</sub> /CNTs                                          | 3M Zn(CF <sub>3</sub> SO <sub>3</sub> ) <sub>2</sub> | 0.3-1.6     | 239/10                                                             | 90.7%/3000                            | [4]   |
| SWCNTs/GO/V <sub>2</sub> O <sub>5</sub> ·1.6H <sub>2</sub> O                   | 2M Zn(CF <sub>3</sub> SO <sub>3</sub> ) <sub>2</sub> | 0.01-1.5    | 211.5/2                                                            | 95.3%/3000                            | [5]   |
| E-VON                                                                          | 2M Zn(CF <sub>3</sub> SO <sub>3</sub> ) <sub>2</sub> | 0.2-1.5     | 155.5/10                                                           | 73%/2500                              | [6]   |
| VSSe/VO <sub>2</sub> /V <sub>2</sub> O <sub>5</sub>                            | 3M Zn(CF <sub>3</sub> SO <sub>3</sub> ) <sub>2</sub> | 0.1-1.7     | 272/10                                                             | 60%/12000                             | [7]   |
| Zn <sub>0.52</sub> V <sub>2</sub> O <sub>5</sub> ·a·1.8 H <sub>2</sub> O       | 3M Zn(CF <sub>3</sub> SO <sub>3</sub> ) <sub>2</sub> | 0.2-1.6     | 161.5/20                                                           | 95.4%/18000                           | [8]   |
| D-VS <sub>4</sub>                                                              | 3M Zn(CF <sub>3</sub> SO <sub>3</sub> ) <sub>2</sub> | 0.1-1.8     | 141/10                                                             | 72%/8000                              | [9]   |
| VO                                                                             | 2M Zn(CF <sub>3</sub> SO <sub>3</sub> ) <sub>2</sub> | 0.2-1.6     | 133.3/50                                                           | 97%/8000                              | [10]  |
| Na <sub>6</sub> [V <sub>10</sub> O <sub>28</sub> ]·nH <sub>2</sub> O           | 2M Zn(CF <sub>3</sub> SO <sub>3</sub> ) <sub>2</sub> | 0.2-1.5     | 84.6/10                                                            | 89.7%/3000                            | [11]  |
| V <sub>2</sub> O <sub>5</sub>                                                  | 3M Zn(CF <sub>3</sub> SO <sub>3</sub> ) <sub>2</sub> | 0.4-1.6     | 207/10                                                             | 85%/5000                              | [12]  |
| Rb-NH <sub>4</sub> V <sub>4</sub> O <sub>10</sub>                              | 3M Zn(CF <sub>3</sub> SO <sub>3</sub> ) <sub>2</sub> | 0.2-1.6     | 152/5                                                              | 87.6%/10000                           | [13]  |

|                                      |                                                      |         |          |             |           |
|--------------------------------------|------------------------------------------------------|---------|----------|-------------|-----------|
| V <sub>2</sub> O <sub>5</sub> @PEDOT | 2M Zn(CF <sub>3</sub> SO <sub>3</sub> ) <sub>2</sub> | 0.2-1.6 | 250/5    | 98.2%/2000  | [14]      |
| Ca-VO <sub>2</sub>                   | 3M Zn(CF <sub>3</sub> SO <sub>3</sub> ) <sub>2</sub> | 0.3-1.4 | 231.2/30 | 94.7%/16700 | This work |

**Table S3.** Fitting results of the Nyquist plots for VO<sub>2</sub> and Ca-VO<sub>2</sub> cathodes.

| Cathode            | R <sub>c</sub> [Ω] | R <sub>ct</sub> [Ω] | R <sub>i</sub> [Ω] |
|--------------------|--------------------|---------------------|--------------------|
| Ca-VO <sub>2</sub> | 6.03               | 222.30              | 72.89              |
| VO <sub>2</sub>    | 6.77               | 412.90              | 88.85              |

## References

- [1] Q. He, T. Hu, Q. Wu, C. Wang, X. Han et al., Tunnel-oriented VO<sub>2</sub>(B) cathode for high-rate aqueous zinc-ion batteries. *Adv. Mater.* **36**, 2400888 (2024). <https://doi.org/10.1002/adma.202400888>
- [2] X. Hu, S. Gao, T. Lin, X. Peng, Y. Huang et al., Iodine-doped sodium vanadate cathode for improved Zn ion diffusion kinetics. *Adv. Mater.* 2416714 (2025). <https://doi.org/10.1002/adma.202416714>
- [3] Y. Zhang, L. Cui, F. Cui, Y. Huang, G. Zhang et al., Activating H<sub>3</sub>O<sup>+</sup> intercalation chemistry in aqueous Zn-VO<sub>2</sub>(B) batteries via tungsten doping and oxygen vacancies. *Small* **21**, 2501001 (2025). <https://doi.org/10.1002/smll.202501001>
- [4] Y. Du, X. Wang, Y. Zhang, H. Zhang, J. Man, K. Liu, J. Sun, High mass loading CaV<sub>4</sub>O<sub>9</sub> microflowers with amorphous phase transformation as cathode for aqueous zinc-ion battery. *Chem. Eng. J.* **434**, 134642 (2022). <https://doi.org/10.1016/j.cej.2022.134642>

- [5] Z. Qin, G. Han, Y. Yang, S. Hao, L. Yu et al., Freestanding vanadium oxides/carbon hybrid cathode with long-term cyclability at low current density for flexible aqueous zinc ion batteries. *Chem. Eng. J.* **513**, 162952 (2025). <https://doi.org/10.1016/j.cej.2025.162952>
- [6] Y. Xu, F. Shao, Y. Huang, X. Huang, F. Jiang et al., Ultra-fast activated  $\text{NH}_4^+$ -intercalated vanadium oxide cathode for high-performance aqueous zinc-ion batteries. *J. Colloid Interf. Sci.* **683**, 226-235 (2025). <https://doi.org/10.1016/j.jcis.2024.12.162>
- [7] M. Yang, Y. Lin, P. Chen, M. Lai, J. Zhu et al., Unlocking ultrafast-kinetics aAsymmetric heterojunction with multi-anionic redox chemistry enables high energy/power density and low-temperature zinc-ion batteries. *Angew. Chem. Int. Edit.* **64**, e202510907 (2025). <https://doi.org/10.1002/anie.202510907>
- [8] W. Liang, D. Rao, T. Chen, R. Tang, J. Li, H. Jin,  $\text{Zn}_{0.52}\text{V}_2\text{O}_{5-a}\cdot 1.8\text{H}_2\text{O}$  cathode stabilized by in situ phase transformation for aqueous zinc-ion batteries with ultra-long cyclability. *Angew. Chem. Int. Edit.* **61**, e202207779 (2022). <https://doi.org/10.1002/anie.202207779>
- [9] F. Wu, Y. Wang, X. Dai, S. Meng, D. Zheng et al., Toward ultralong lifespan aqueous zinc-ion batteries via sulfur-defect vanadium tetrasulfide cathode. *ACS Appl. Energy Mater.* **6**, 2680-2686 (2023). <https://doi.org/10.1021/acsaem.2c04102>
- [10] W. Qian, Z. Chen, L. Chen, Q. Sun, H. Zhou et al., Mixed-valence vanadium oxides with ultra-high rates and long cycles for aqueous zinc ion batteries. *Appl. Surf. Sci.* **684**, 161981 (2025). <https://doi.org/10.1016/j.apsusc.2024.161981>
- [11] H. He, F.-C. Pan, X.-W. Liang, Q. Hu, S. Liu, et al., Unveiling the effect of structural water on Zn-ion storage of polyoxovanadate for high-rate and long-life

aqueous zinc ion battery. *Chem. Eng. J.* **462**, 142221 (2023).  
<https://doi.org/10.1016/j.cej.2023.142221>

[12] D. Chen, X. Rui, Q. Zhang, H. Geng, L. Gan et al., Persistent zinc-ion storage in mass-produced  $V_2O_5$  architectures. *Nano Energy* **60**, (2019) 171-178.  
<https://doi.org/10.1016/j.nanoen.2019.03.034>

[13] K. Wang, S. Li, X. Chen, J. Shen, H. Zhao, Y. Bai, Trifunctional  $Rb^+$ -intercalation enhancing the electrochemical cyclability of ammonium vanadate cathode for aqueous zinc ion batteries. *ACS nano* **18**, 7311-7323 (2024).  
<https://doi.org/10.1021/acsnano.4c00803>

[14] Z. Li, Y. Liu, S. Yang, Z. Pan, C. Liu et al., Probing capacity decay in vanadium oxide cathodes of aqueous zinc-ion batteries using operando EQCM-D. *ACS Energy Lett.* **10**, 2821-2830 (2025). <https://doi.org/10.1021/acsenerylett.5c00901>
